# Supplementary material for: Phospho-kinase profile of triple negative breast cancer and androgen receptor signaling
Source: PubMed Central journal article supplement (PMC4021223; doi:10.1186/1471-2407-14-302), 2014-04-30
Supplement: 1471-2407-14-302-S2.pdf [file 1471-2407-14-302-S2.pdf]

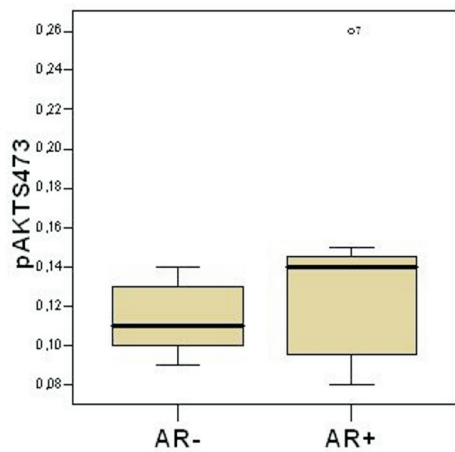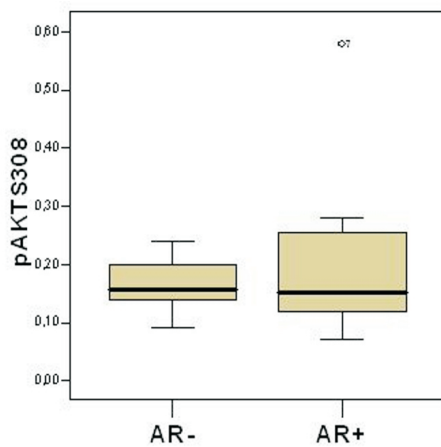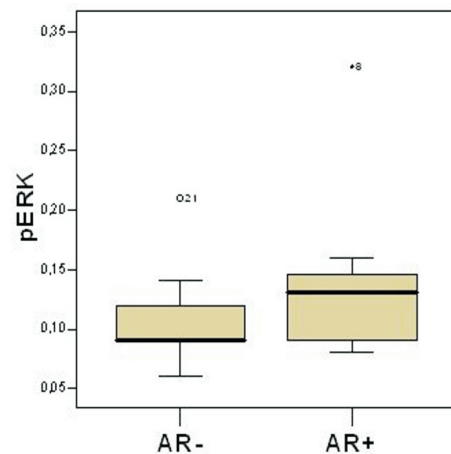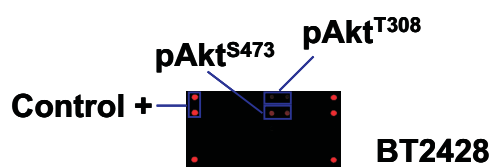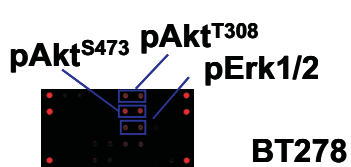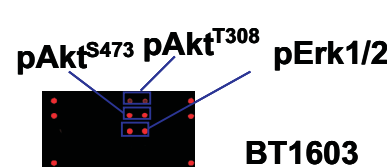

Supplementary Figure 2
